# Supplementary material
Source: PubMed Central journal article supplement (PMC3480661)

## Supplemental Material

### Supplemental Table.

**Spearman Correlation coefficients between Cystatin C and other measures of GFR in patients with “preserved” and “impaired” renal function.**

|                                | CORRELATIONS          |                                                  |                                           |
|--------------------------------|-----------------------|--------------------------------------------------|-------------------------------------------|
|                                | Total Cohort<br>n=823 | eGFR $\geq$ 60ml/min/1.73m <sup>2</sup><br>n=615 | eGFR<60ml/min/1.73m <sup>2</sup><br>n=208 |
| <b>Urea</b>                    | 0.70                  | 0.49                                             | 0.64                                      |
| <b>Creatinine</b>              | 0.73                  | 0.50                                             | 0.68                                      |
| <b>eGFR<sub>MDRD</sub></b>     | -0.79                 | -0.60                                            | -0.76                                     |
| <b>eGFR<sub>CysC</sub></b>     | -0.98                 | -0.97                                            | -0.99                                     |
| <b>eGFR<sub>sCr+CysC</sub></b> | -0.93                 | -0.88                                            | -0.94                                     |

**Supplemental Figure.**

**Incidence of Death, Myocardial Infarction, or Stroke according to quartiles of Different Renal Function Measures in the Preserved Renal Function Subgroup ( $eGFR_{MDRD} \geq 60 \text{ ml/min/1.73m}^2$ ).**

1<sup>st</sup> quartile encompasses lowest values of creatinine, urea, cystatin C,  $eGFR_{MDRD}$  and  $eGFR_{Cys C}$ . P-values for trend according to Cochran-Armitage.

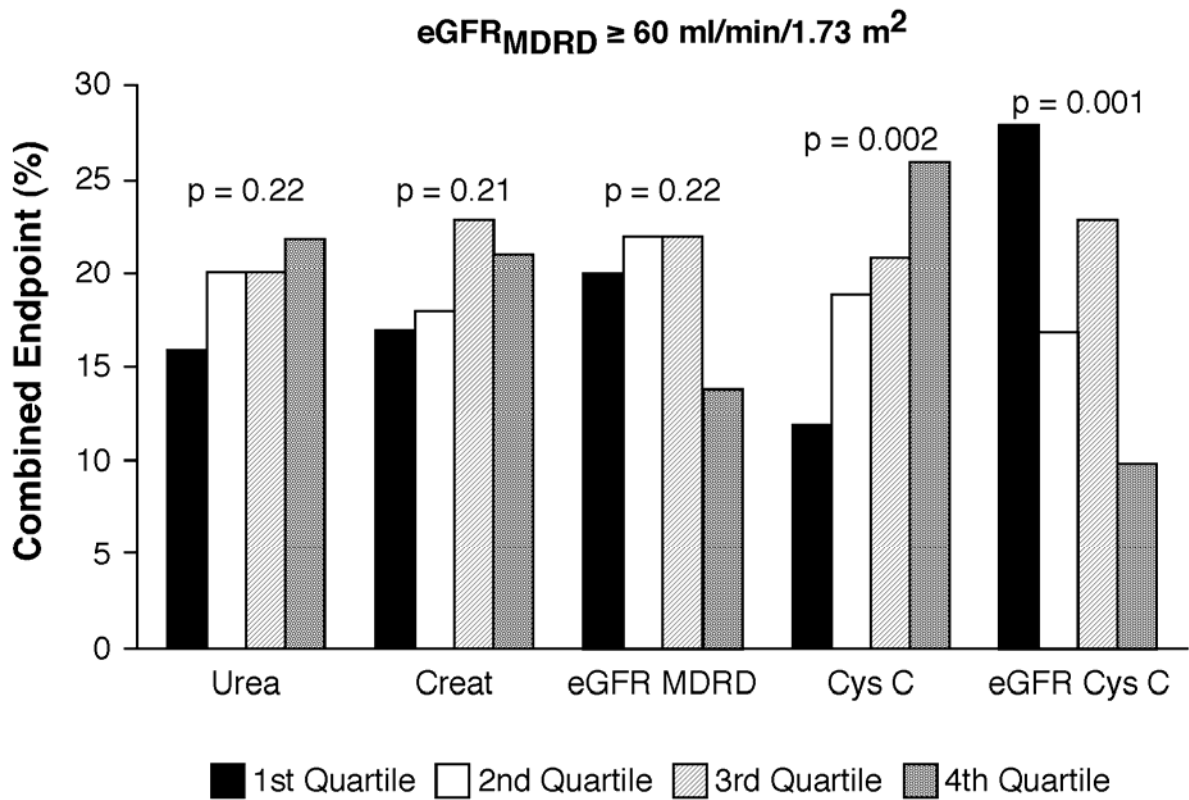

Supplement: NIHMS408257-supplement-supplement_1.pdf [file NIHMS408257-supplement-supplement_1.pdf]
